# Supplementary material for: Potentiometric sensors using cotton yarns, carbon nanotubes and polymeric membranes
Source: Royal Society of Chemistry journal article supplement (doi:10.1039/c3an00710c), 2013-01-01
Supplement: c3an00710c.pdf [file c3an00710c.pdf]

Supplementary information

Table S1: ionophore, membrane composition and selectivity values measured

| Ionophore                                                                                                         | Membrane Composition                                                                     | $\text{Log } K^{\text{POT}}_{\text{Analyte/Interferent}}$                                         | Method                          |
|-------------------------------------------------------------------------------------------------------------------|------------------------------------------------------------------------------------------|---------------------------------------------------------------------------------------------------|---------------------------------|
| 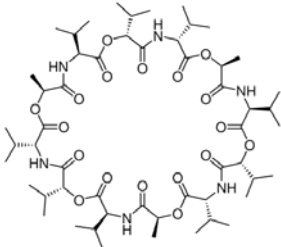<br>$\text{K}^+ 1$ (valinomycin) | $\text{K}^+ 1$ (2% wt)<br>KTpClPB (0.5% wt)<br>DOS (64.7% wt)<br>PVC (32.8% wt)          | $\text{Li}^+$ : -4.4<br>$\text{Na}^+$ : -3.6<br>$\text{NH}_4^+$ : -1.8<br>$\text{Ca}^{2+}$ : -4.6 | Fixed interference method (FIM) |
| <br>$\text{NH}_4^+ 1$ (nonactin) | $\text{NH}_4^+ 1$ (1% wt)<br>di-2-Ethyl-hexyl adipate (DOA) (66.8% wt)<br>PVC (32.2% wt) | $\text{Na}^+$ : -2.9<br>$\text{K}^+$ : -0.9                                                       | Fixed interference method (FIM) |

Figure S2: Changes on the calibration plots of the  $\text{K}^+$  (left) and  $\text{NH}_4^+$  (right) yarn sensors over time

Lifetime of potassium and ammonium yarn electrodes over time. (○) 1st day after conditioning; (□) 14 days; (△) 22 days and (◇) 30 days.

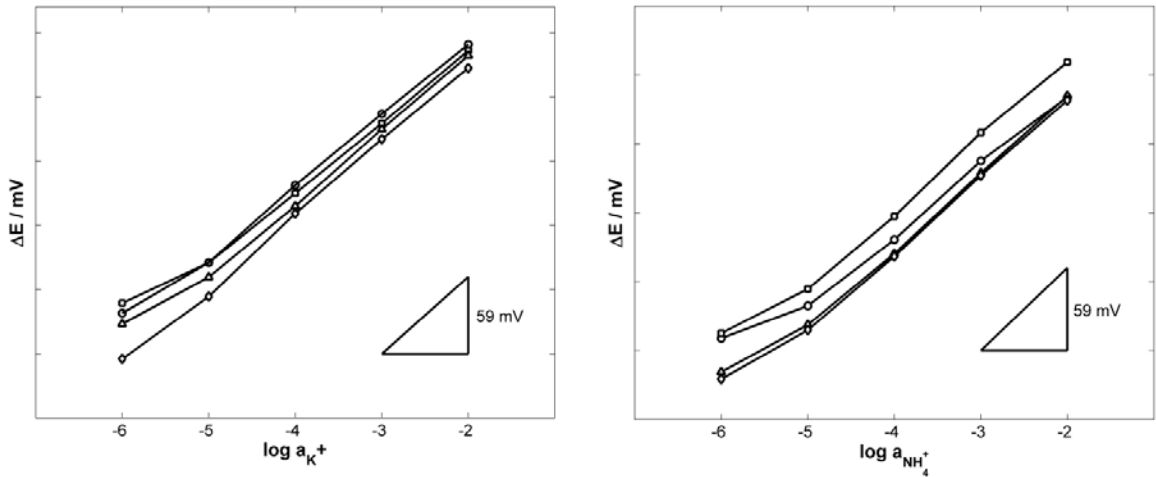

**Table S2: parameters of the calibration plots for the different yarn sensors**

| <i>Electrode</i>             | <b>Sensitivity</b> | <b>Intercept</b> |
|------------------------------|--------------------|------------------|
| K <sup>+</sup>               | 54.9 ± 1.6*        | 399 ± 5*         |
| NH <sub>4</sub> <sup>+</sup> | 53.9 ± 0.7*        | 305.8 ± 2.6*     |
| pH                           | -55.7 ± 1.2*       | 457.1 ± 3.2*     |

\*Statistical error was calculated by using the student's t-test of sensitivity and intercept.
